# Supplementary material for: Copper complexes as prospective anticancer agents: in vitro and in vivo evaluation, selective targeting of cancer cells by DNA damage and S phase arrest
Source: PubMed Central journal article supplement — RSC Adv. 2018 May 9;8(30):16973–90. doi: 10.1039/c8ra00954f (PMC9080330; doi:10.1039/c8ra00954f), 2018-05-09
Supplement: RA-008-C8RA00954F-s001.pdf [file RA-008-C8RA00954F-s001.pdf]

**Electronic supplementary information (ESI)**

**Copper complexes as prospective anticancer agents: *In vitro* and *in vivo*  
evaluation, selective targeting of cancer cells by DNA damage  
and S phase arrest**

**Dharmasivam Mahendiran,<sup>a</sup> Sethu Amuthakala,<sup>a</sup> Nattamai S. P. Bhuvanesh,<sup>b</sup> Raju Senthil  
Kumar,<sup>c</sup> and Aziz Kalilur Rahiman<sup>\*a</sup>**

*<sup>a</sup>Post-Graduate and Research Department of Chemistry, The New College (Autonomous),  
Chennai 600 014, India.*

*<sup>b</sup>Department of Chemistry, Texas A & M University, College Station, TX 77842, USA.*

*<sup>c</sup>Department of Pharmaceutical Chemistry, Swamy Vivekanandha College of Pharmacy,  
Elayampalayam, Tiruchengodu 637 205, India.*

\*Corresponding author. Tel.: +91 44 2835 0297; Fax: +91 44 2835 2883

E-mail address: [akrahmanjkr@thenewcollege.in](mailto:akrahmanjkr@thenewcollege.in); [akrahmanjkr@gmail.com](mailto:akrahmanjkr@gmail.com)

---

**Table S1** Crystal data and structure refinement of the ligand L<sup>4</sup>.

|                                                  |                                                  |
|--------------------------------------------------|--------------------------------------------------|
| CCDC                                             | 1475312                                          |
| Empirical formula                                | C <sub>9</sub> H <sub>11</sub> N <sub>3</sub> OS |
| Formula weight                                   | 209.27                                           |
| Temperature (K)                                  | 150(2)                                           |
| Wavelength (Å)                                   | 0.71073                                          |
| Crystal system                                   | Triclinic                                        |
| Space group                                      | <i>P</i> $\bar{1}$                               |
| Unit cell (Å) dimensions (°)                     | a = 6.885(3)                                     |
|                                                  | b = 7.108(3)                                     |
|                                                  | c = 11.230(4)                                    |
|                                                  | $\beta$ = 76.662(4)                              |
| Volume (Å <sup>3</sup> )                         | 500.9(3)                                         |
| Z, Calculated density (Mg/m <sup>3</sup> )       | 2, 1.387                                         |
| Absorption coefficient (mm <sup>-1</sup> )       | 0.293                                            |
| F(000)                                           | 220                                              |
| Crystal size (mm <sup>3</sup> )                  | 0.25 × 0.19 × 0.04                               |
| Theta range for data collection (°)              | 1.910 to 27.519                                  |
| Limiting indices                                 | -8 ≤ h ≤ 8                                       |
|                                                  | -9 ≤ k ≤ 9                                       |
|                                                  | -14 ≤ l ≤ 13                                     |
| Reflections collected/unique                     | 4355/2227 [R(int) = 0.0249]                      |
| Completeness to theta (%)                        | 99.30                                            |
| Refinement method                                | Full-matrix least-squares on F <sup>2</sup>      |
| Data/restraints/ parameters                      | 2227/0/129                                       |
| Goodness-of-fit on F <sup>2</sup>                | 1.049                                            |
| Final R indices [I > 2σ(I)]                      | R1 = 0.0382, wR2 = 0.0998                        |
| R indices (all data)                             | R1 = 0.0439, wR2 = 0.1042                        |
| Largest diff. Peak and hole (e Å <sup>-3</sup> ) | 0.291 and -0.287                                 |

**Table S2** Selected bond lengths (Å) and bond angles (°) of the ligand L<sup>4</sup>.

| Bond   | Bond lengths (Å) | Bond      | Bond angles (°) |
|--------|------------------|-----------|-----------------|
| S1–C9  | 1.7053(17)       | C7–N1–N2  | 117.52(14)      |
| N1–C7  | 1.3683(19)       | C9–N2–N1  | 117.48(13)      |
| N1–N2  | 1.286(2)         | C9–N3–C10 | 122.62(14)      |
| N2–C9  | 1.3897(19)       | C2–C1–C6  | 117.54(15)      |
| N3–C9  | 1.341(2)         | C2–C1–C7  | 122.26(14)      |
| N3–C10 | 1.320(2)         | C6–C1–C7  | 120.20(14)      |
| C1–C2  | 1.399(2)         | C1–C2–C3  | 121.15(14)      |
| C1–C6  | 1.400(2)         | C4–C3–C2  | 120.14(15)      |
| C1–C7  | 1.480(2)         | C3–C4–C5  | 119.76(15)      |
| C2–C3  | 1.383(2)         | C4–C5–C6  | 119.63(14)      |
| C3–C4  | 1.390(2)         | C5–C6–C1  | 121.75(15)      |
| C4–C5  | 1.390(2)         | N1–C7–C1  | 115.28(14)      |
| C5–C6  | 1.380(2)         | N1–C7–C8  | 124.54(15)      |
| C7–C8  | 1.496(2)         | C1–C7–C8  | 120.18(14)      |
| –      | –                | N3–C9–N2  | 117.30(14)      |
| –      | –                | N3–C9–S1  | 122.56(12)      |
| –      | –                | N2–C9–S1  | 120.14(12)      |

**Table S3** Hydrogen bond geometry of the ligand L<sup>4</sup> [Å and °].

| D–H⋯A                 | D–H  | H⋯A  | D⋯A      | D–H⋯A |
|-----------------------|------|------|----------|-------|
| O(1)–H(1)⋯S(1) (i)    | 0.84 | 2.41 | 3.247(2) | 177.3 |
| N(2)–H(2)⋯S(1) (ii)   | 0.88 | 2.79 | 3.516(2) | 140.6 |
| N(3)–H(3A)⋯O(1) (iii) | 0.88 | 2.20 | 2.953(2) | 143.2 |
| N(3)–H(3B)⋯S(1) (iv)  | 0.88 | 2.56 | 3.415(2) | 165.3 |
| C(8)–H(8A)⋯S1 (ii)    | 0.98 | 2.87 | 3.682(2) | 140.0 |

Symmetry code: (i) x, y, z+1 (ii) -x+1, -y, -z (iii) -x+1, -y+1, -z+1 (iv) -x, -y+1, -z.

**Table S4** B3LYP/LANL2DZ Bond lengths (Å) and bond angles (°) of complexes (1–6).

| Bond lengths |        |        |        |        |        |        | Experimental<br>[15, 16] |
|--------------|--------|--------|--------|--------|--------|--------|--------------------------|
| 1            | 2      | 3      | 4      | 5      | 6      |        |                          |
| Cu1–S1       | 2.213  | 2.219  | 2.212  | 2.211  | 2.217  | 2.210  | 2.211 (11)               |
| Cu1–S2       | 2.219  | 2.226  | 2.221  | 2.236  | 2.231  | 2.229  | 2.221 (12)               |
| Cu1–Cl1      | 2.309  | 2.301  | 2.305  | 2.312  | 2.303  | 2.301  | 2.303 (12)               |
| Bond angles  |        |        |        |        |        |        |                          |
| S2–Cu1–S1    | 119.42 | 120.33 | 121.09 | 121.78 | 122.01 | 121.12 | 121.61                   |
| S2–Cu1–Cl1   | 116.47 | 117.28 | 116.76 | 118.03 | 117.95 | 118.69 | 118.33                   |
| S1–Cu1–Cl1   | 122.35 | 121.34 | 121.04 | 120.73 | 121.51 | 120.29 | 120.01                   |

**Table S5** Molecular docking parameters of the copper(I) complexes (**1–6**) with DNA.

| Complexes | Final Intermolecular Energy<br>(kcal/mol) |                         |           | Final Total<br>Internal<br>Energy (2)<br>(kcal/mol) | Torsional Free<br>Energy (3)<br>(kcal/mol) | Unbound<br>System's<br>Energy (4)<br>(kcal/mol) | Estimated Free<br>Energy of<br>Binding<br>[(1)+(2)+(3)-(4)]<br>(kcal/mol) |
|-----------|-------------------------------------------|-------------------------|-----------|-----------------------------------------------------|--------------------------------------------|-------------------------------------------------|---------------------------------------------------------------------------|
|           | vdW +<br>H bond +<br>dissolving<br>energy | Electrostatic<br>Energy | Total (1) |                                                     |                                            |                                                 |                                                                           |
| 1         | -5.84                                     | -0.26                   | -6.10     | -0.19                                               | +1.09                                      | -0.33                                           | -4.87                                                                     |
| 2         | -6.96                                     | -0.97                   | -7.93     | -0.32                                               | +1.29                                      | -0.44                                           | -6.52                                                                     |
| 3         | -6.82                                     | -0.88                   | -7.70     | -0.54                                               | +1.62                                      | -0.65                                           | -5.97                                                                     |
| 4         | -6.02                                     | -0.74                   | -6.76     | -0.28                                               | +1.14                                      | -0.36                                           | -5.54                                                                     |
| 5         | -4.67                                     | -0.81                   | -5.48     | -0.36                                               | +1.28                                      | -0.48                                           | -4.08                                                                     |
| 6         | -5.19                                     | -0.27                   | -5.46     | -0.49                                               | +1.55                                      | -0.47                                           | -3.93                                                                     |

**Table S6** Molecular docking parameters of the copper(I) complexes (**1–6**) with focal adhesion kinase (FAK) receptor.

| Complexes | Final Intermolecular Energy<br>(kcal/mol) |                         |           | Final Total<br>Internal Energy<br>(2) (kcal/mol) | Torsional Free<br>Energy (3)<br>(kcal/mol) | Unbound<br>System's<br>Energy (4)<br>(kcal/mol) | Estimated Free<br>Energy of<br>Binding<br>[(1)+(2)+(3)– (4)]<br>(kcal/mol) |
|-----------|-------------------------------------------|-------------------------|-----------|--------------------------------------------------|--------------------------------------------|-------------------------------------------------|----------------------------------------------------------------------------|
|           | vdW +<br>H bond +<br>dissolving<br>energy | Electrostatic<br>Energy | Total (1) |                                                  |                                            |                                                 |                                                                            |
| 1         | –8.10                                     | –0.16                   | –8.26     | –1.26                                            | –1.62                                      | +3.29                                           | –6.08                                                                      |
| 2         | –11.35                                    | –0.05                   | –11.40    | –0.05                                            | +3.84                                      | +0.33                                           | –7.94                                                                      |
| 3         | –9.45                                     | –0.36                   | –9.81     | –0.36                                            | +3.84                                      | +0.15                                           | –6.47                                                                      |
| 4         | –8.35                                     | –0.17                   | –8.52     | –1.54                                            | +3.291                                     | –0.47                                           | –6.29                                                                      |
| 5         | –8.15                                     | +0.08                   | –8.06     | –0.79                                            | +3.29                                      | +0.24                                           | –5.06                                                                      |
| 6         | –8.11                                     | –0.16                   | –8.27     | –0.34                                            | +3.84                                      | –0.46                                           | –5.01                                                                      |

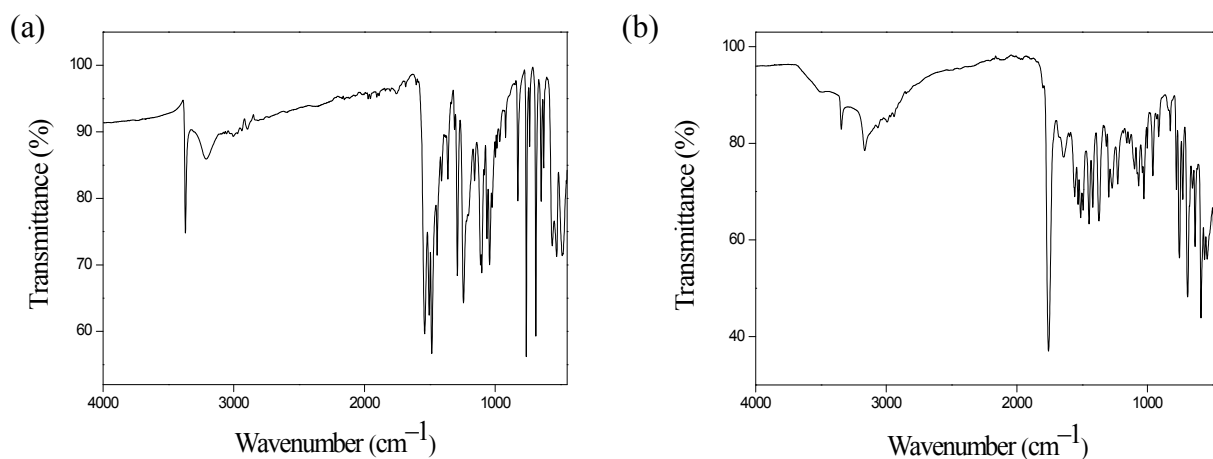

**Fig. S1.** FT IR spectra of ligand L<sup>2</sup> (a) and copper(I) complex 2 (b).

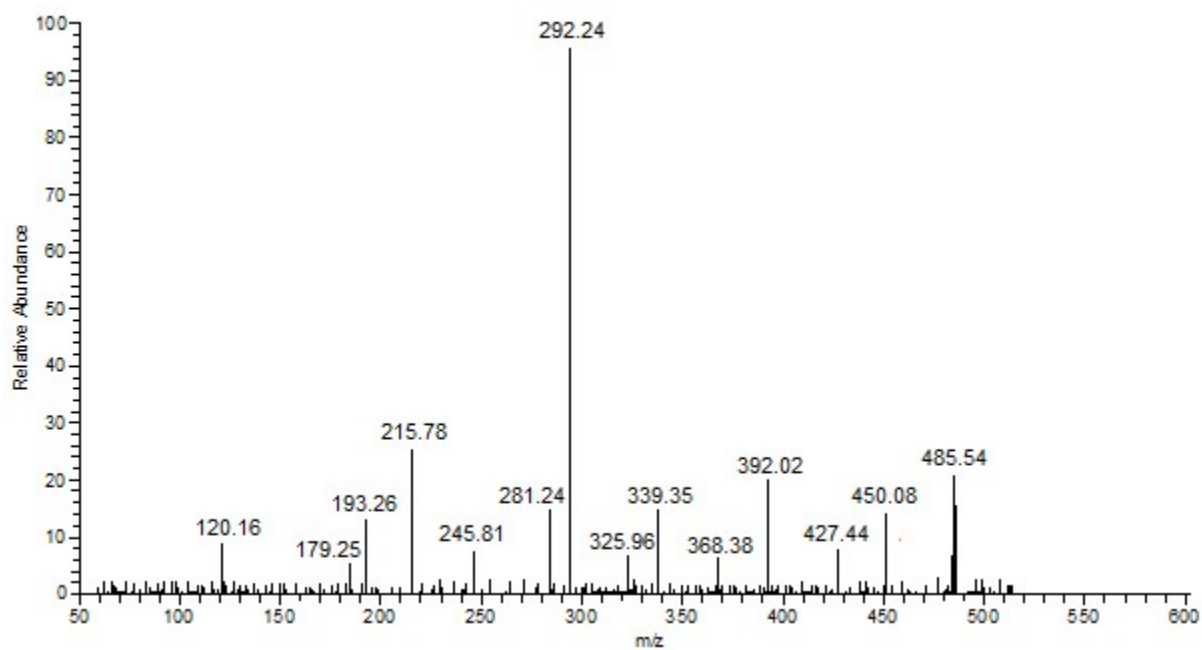

**Fig. S2.** ESI mass spectrum of complex 1.

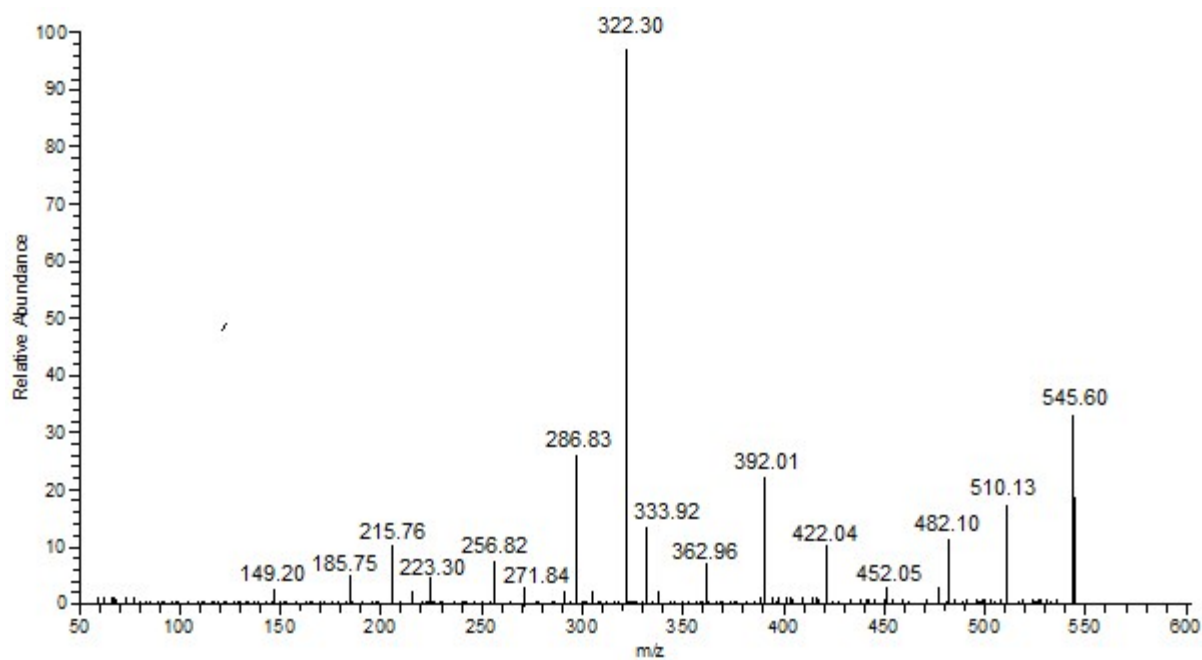

**Fig. S3.** ESI mass spectrum of complex 3.

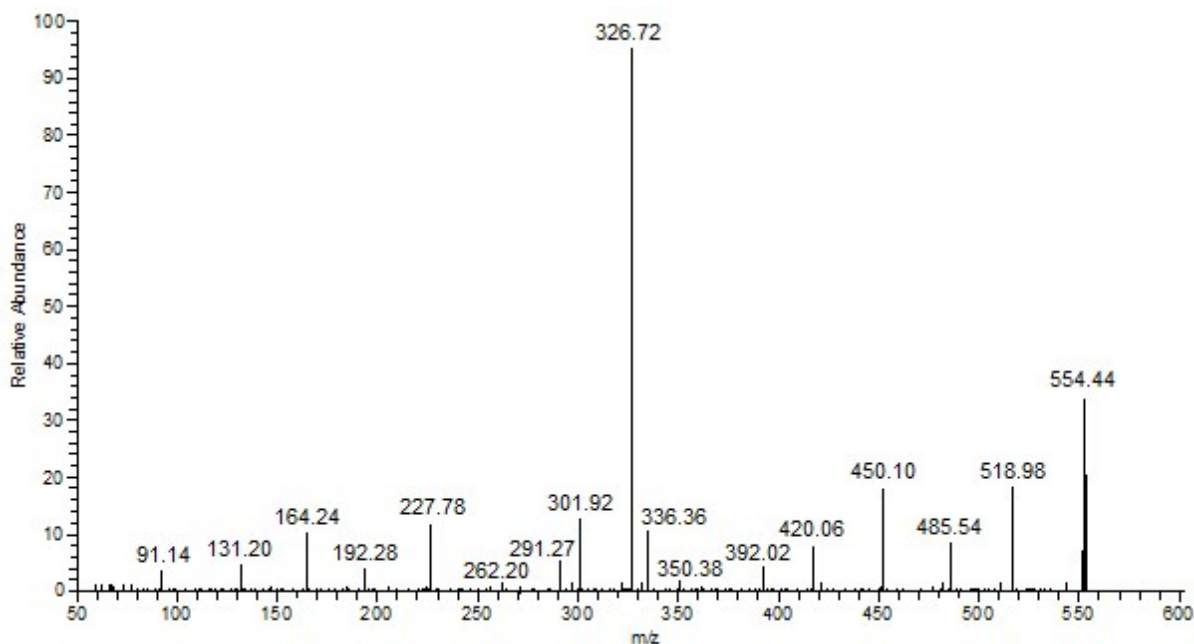

**Fig. S4.** ESI mass spectrum of complex 6.



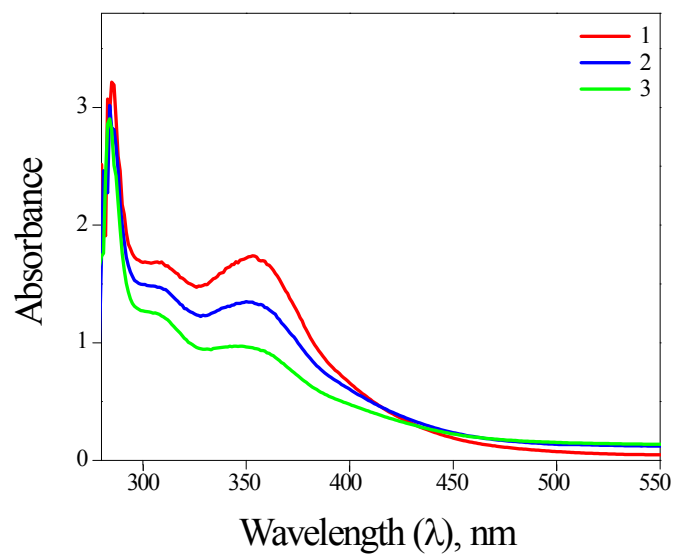

**Fig. S5.** UV-Vis absorption spectra of the copper(I) complexes **1–3**.

(a)

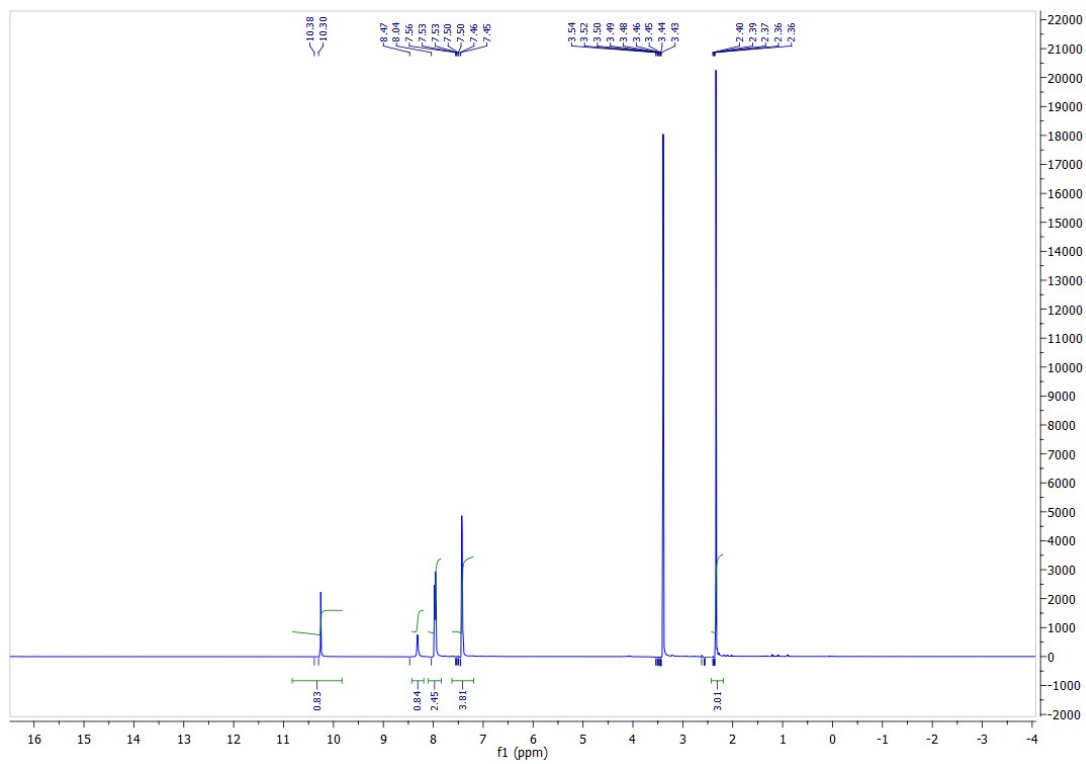

(b)

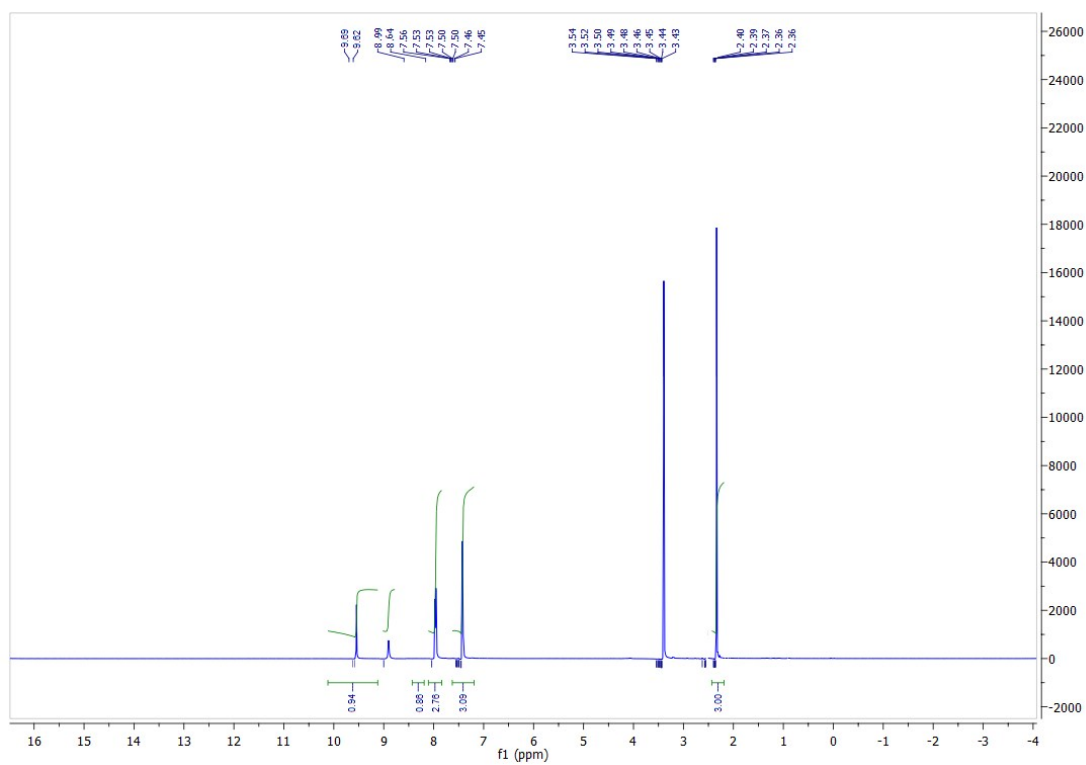

**Fig. S6.** <sup>1</sup>H NMR spectra of ligand L<sup>1</sup> (a) and complex 1 (b).

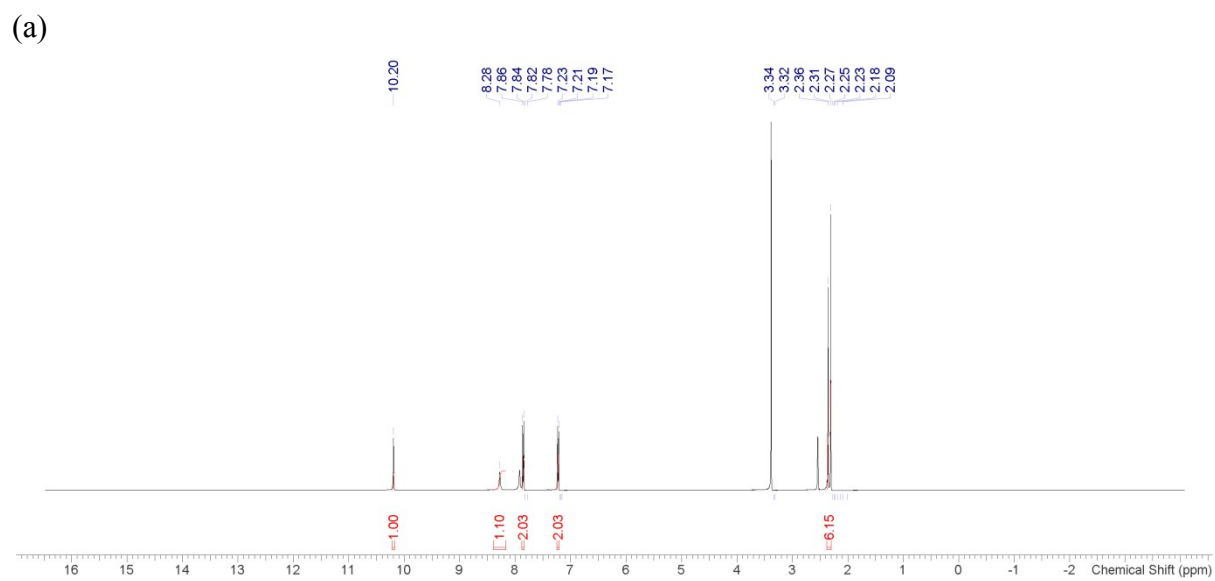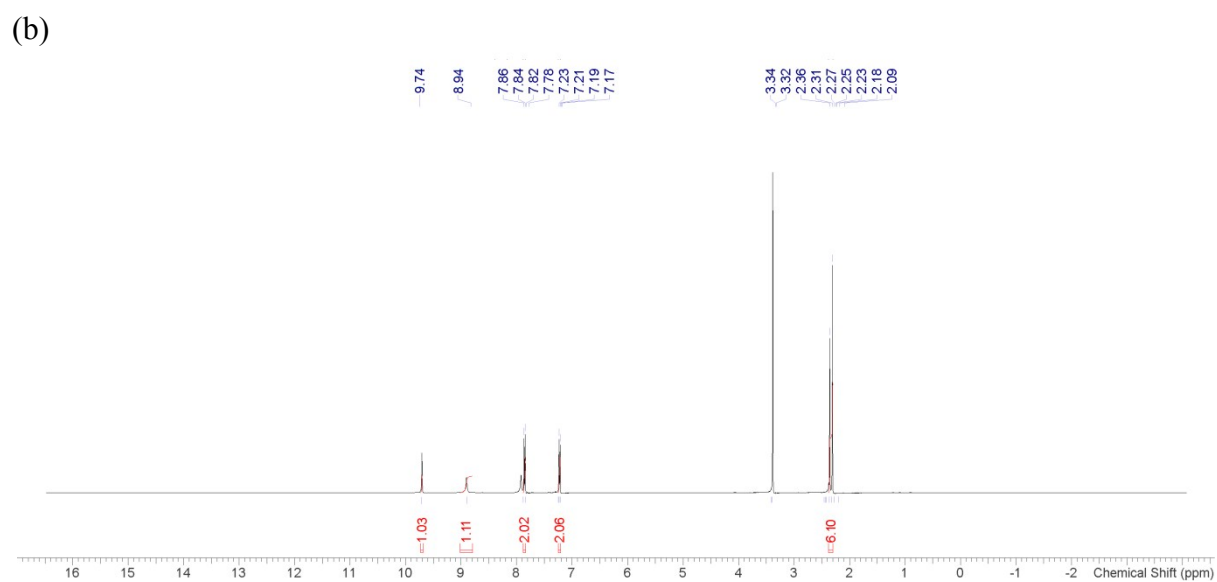

**Fig. S7.**  $^1\text{H}$  NMR spectra of ligand  $\text{L}^2$  (a) and complex **2** (b).

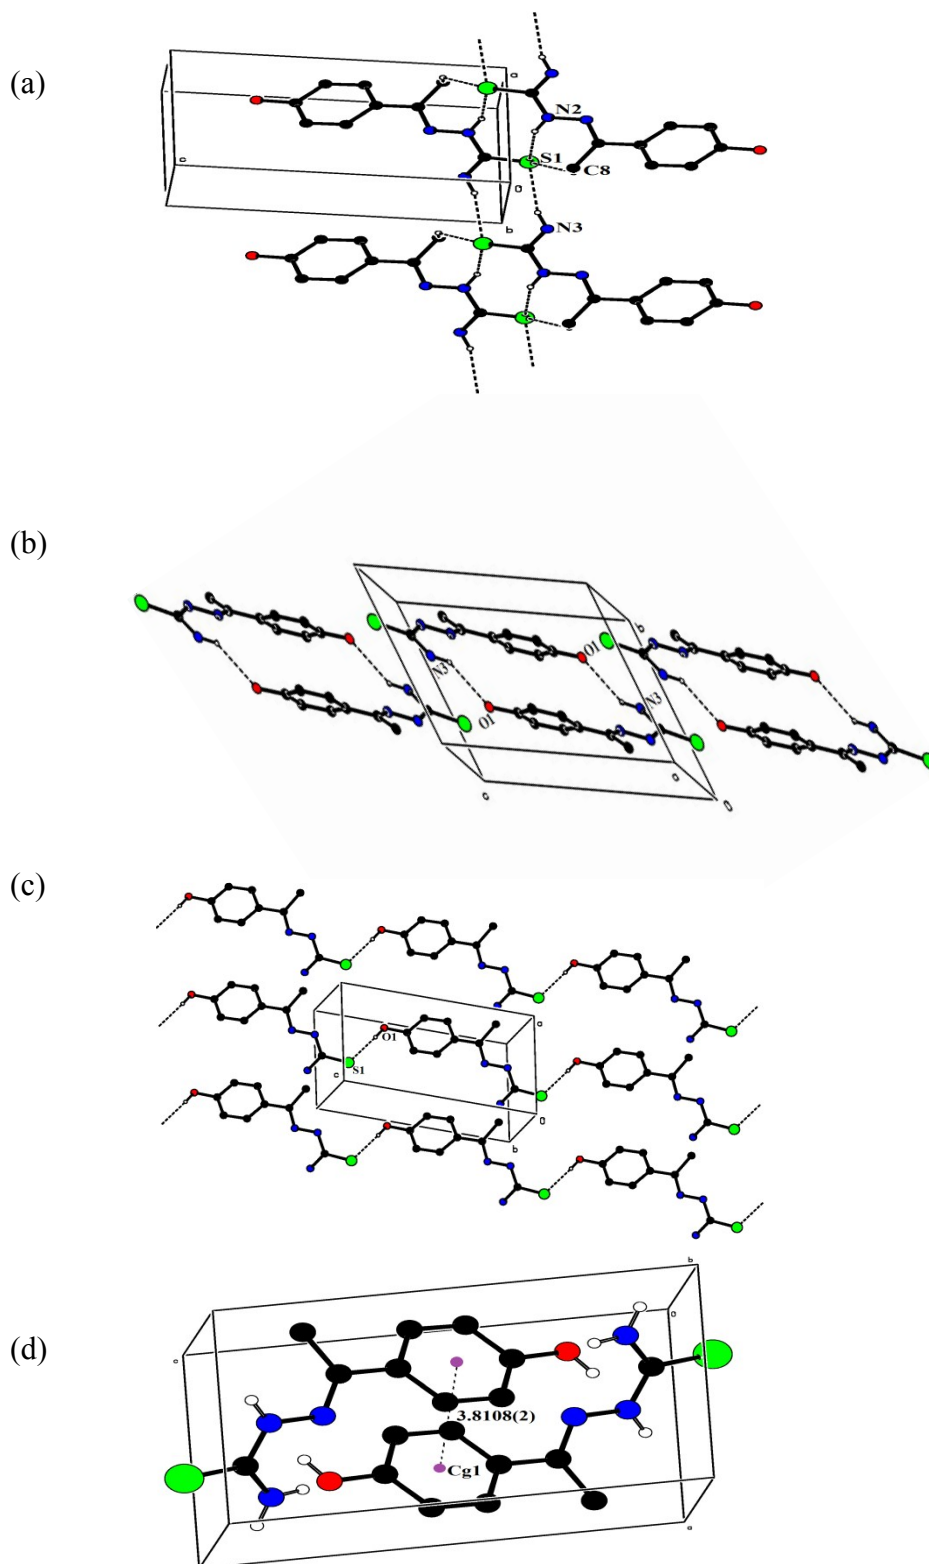

**Fig. S8.**  $N2-H2\cdots S1$ ,  $N3-H3B\cdots S1$  and  $C8-H8A\cdots S1$  intermolecular interaction generating  $R_2^2(8)$  ring motif (a),  $N3-H3A\cdots O1$  intermolecular interaction generating  $R_2^2(22)$  ring motif viewed down  $a'$  axis (b), the intermolecular  $O1-H1\cdots S1$  hydrogen bonds forming a  $C(11)$  chain running along  $c'$  axis (c) and  $\pi$ - $\pi$  stacking interactions (d) for the ligand  $L^4$ .

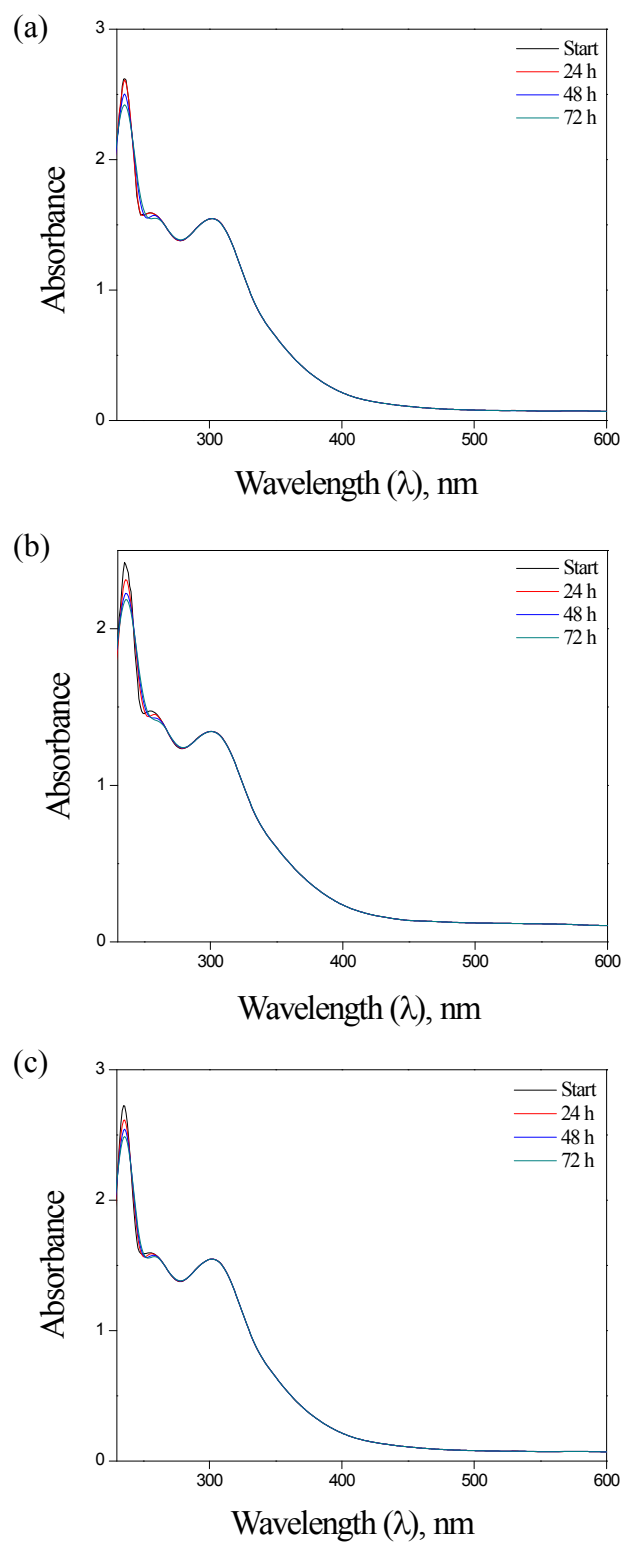

**Fig. S9.** Stability of copper(I) complexes **1** (a), **2** (b) and **3** (c) measured by UV-Vis spectroscopy.

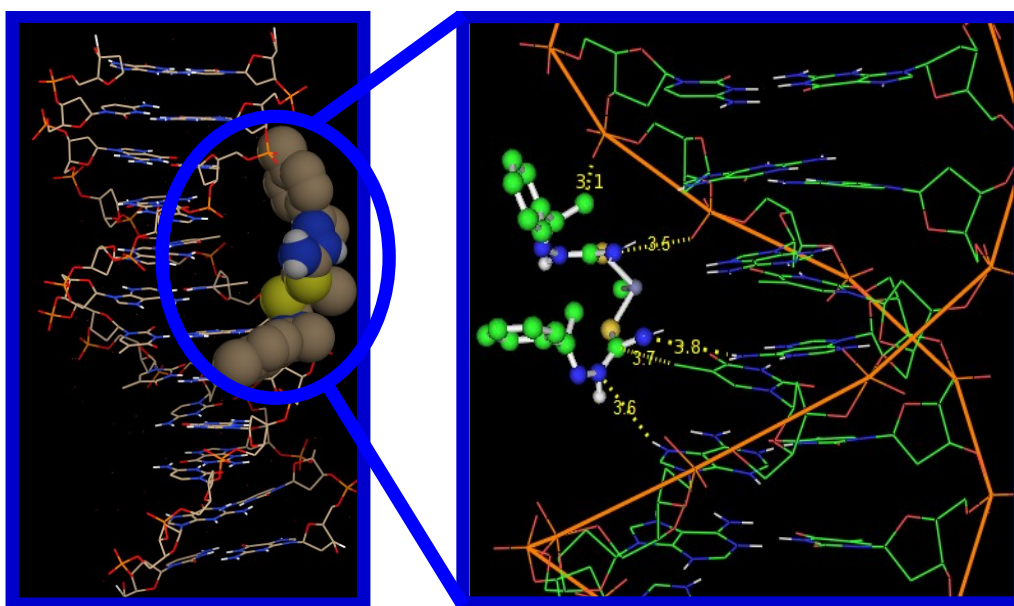

**Fig. S10.** Molecular docking view of complex **1** with DNA (PDB ID: 1BNA) dodecamer duplex of sequence d(CGCGAATTCGCG)<sub>2</sub>.

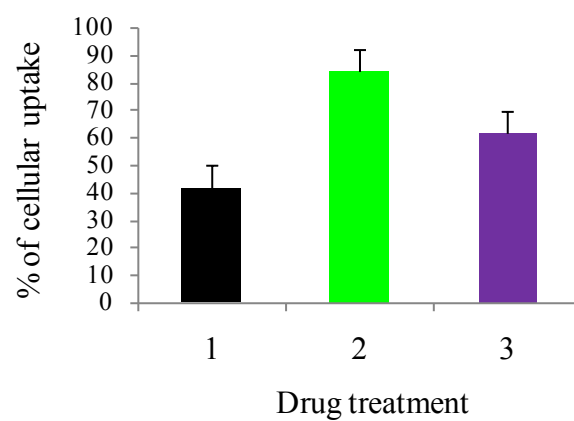

**Fig. S11.** Bar diagram of complexes (**1–3**) for 24 h.

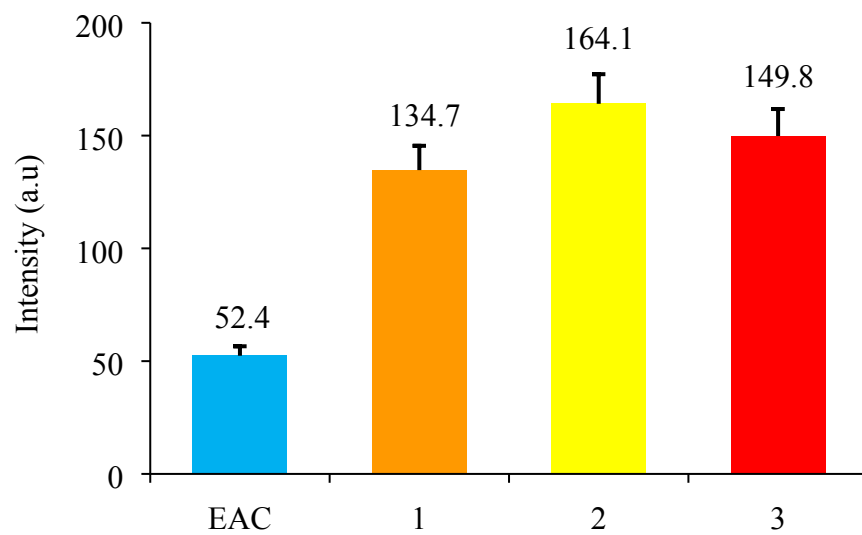

**Fig. S12.** ROS generation in EAC cells exposed to copper(I) complexes **1–3** for 24 h.

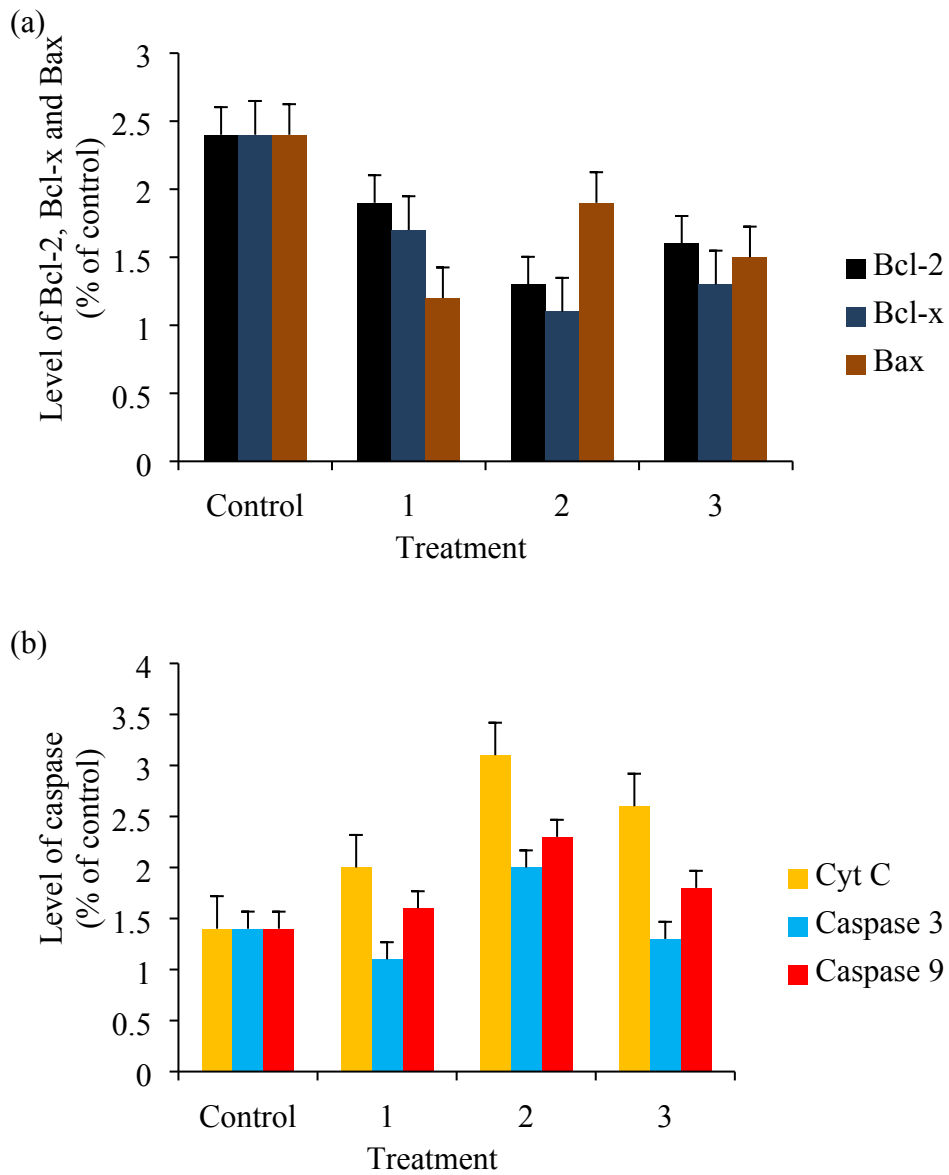

**Fig. S13.** Percentage expression levels of Bcl-2, Bcl-x and Bax (a). Percentage expression levels of caspase 3/9 and cytochrome c (b); The percentage values are those relative to the control.
